# Supplementary material for: CO2- and thermo-responsive vesicles: from expansion–contraction transformation to vesicles-micelles transition
Source: Royal Society of Chemistry journal article supplement (doi:10.1039/c5py00024f), 2015-01-01
Supplement: c5py00024f1.pdf [file c5py00024f1.pdf]

Electronic Supplementary Information for:

**CO<sub>2</sub>- and thermo-responsive vesicles: from expansion-contraction  
transformation to vesicles-micelles transition**

Hui Zou<sup>a</sup> and Weizhong Yuan\*<sup>a,b</sup>

*<sup>a</sup>Institute of Nano and Bio-polymeric Materials, School of Materials Science and Engineering,  
Tongji University, 4800Cao'an Road, Shanghai 201804, People's Republic of China*

*<sup>b</sup>Key Laboratory of Advanced Civil Materials, Ministry of Education, 4800Cao'an Road,  
Shanghai 201804, People's Republic of China*

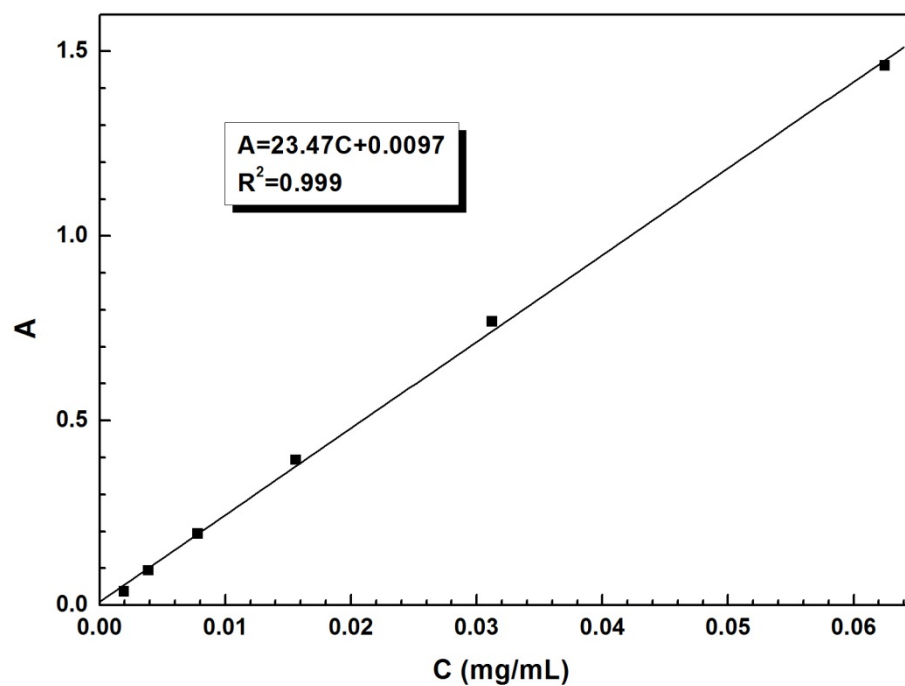

**Fig. S1** The standard curve of doxorubicin (DOX) in PBS buffer.
